# Supplementary material for: Bone Marrow Absorbed Doses and Correlations with Hematologic Response During 177Lu-DOTATATE Treatments Are Influenced by Image-Based Dosimetry Method and Presence of Skeletal Metastases
Source: PubMed Central journal article supplement (PMC6785794; doi:10.2967/jnumed.118.225235), 2019-10
Supplement: jnm225235SupplementalData.pdf [file jnm225235SupplementalData.pdf]

Supplemental Table 1. Patient and dosimetry data for the first treatment cycle.

| No. | Age | Gender | Skeletal metastases | Dosimetry method (Gy/7.4 Gy) |         |         |         |          | Relative platelet counts |
|-----|-----|--------|---------------------|------------------------------|---------|---------|---------|----------|--------------------------|
|     |     |        |                     | Planar                       | V-SPECT | L-SPECT | T-SPECT | L4-SPECT |                          |
| 3   | 59  | f      | 0                   | 0.12                         | 0.19    | 0,21    | 0,18    | 0,15     | 0,71                     |
| 4   | 46  | m      | 1                   | 0.14                         | 0.25    | 0,22    | 0,30    | 0,16     | 0,77                     |
| 5   | 52  | m      | 0                   | 0.17                         | 0.40    | 0,25    | 0,49    | 0,25     | 0,96                     |
| 6   | 35  | m      | 1                   | 0.17                         | 0.31    | 0,27    | 0,35    | 0,19     | 0,57                     |
| 7   | 55  | m      | 1                   | 0.19                         | 1.02    | 1,02    | 0,95    | 0,86     | 0,64                     |
| 8   | 59  | m      | 0                   | 0.16                         | 0.39    | 0,38    | 0,41    | 0,32     | 0,62                     |
| 9   | 54  | f      | 1                   | 0.23                         | 0.97    | 0,80    | 1,22    | 0,71     | 0,38                     |
| 10  | 68  | m      | 0                   | 0.17                         | 0.38    | 0,33    | 0,57    | 0,26     | 0,70                     |
| 11  | 77  | f      | 0                   | 0.19                         | 0.28    | 0,30    | 0,28    | 0,17     | 0,58                     |
| 12  | 64  | m      | 1                   | 0.14                         | 0.39    | 0,41    | 0,37    | 0,41     | 0,80                     |
| 13  | 66  | m      | 1                   | 0.14                         | 0.55    | 0,55    | 0,58    | 0,43     | 0,35                     |
| 16  | 43  | m      | 0                   | 0.21                         | 0.60    | 0,67    | 0,60    | 0,34     | 0,45                     |
| 17  | 77  | f      | 0                   | 0.16                         | 0.43    | 0,43    | 0,48    | 0,39     | 0,70                     |
| 18  | 79  | f      | 1                   | 0.22                         | 1.72    | 1,61    | 2,14    | 1,45     | 0,65                     |
| 19  | 68  | f      | 1                   | 0.20                         | 0.77    | 1,29    | 0,61    | 0,77     | 0,53                     |
| 20  | 57  | f      | 0                   | 0.21                         | 0.49    | 0,33    | 0,58    | 0,22     | 0,59                     |
| 21  | 54  | f      | 0                   | 0.13                         | 0.29    | 0,29    | 0,25    | 0,35     | 0,91                     |
| 22  | 61  | f      | 0                   | 0.21                         | 0.38    | 0,34    | 0,50    | 0,34     | 0,41                     |
| 23  | 71  | m      | 1                   | 0.19                         | 0.45    | 0,58    | 0,41    | 0,52     | 0,47                     |
| 24  | 67  | f      | 1                   | 0.17                         | 0.39    | 0,36    | 0,42    | 0,36     | 0,78                     |
| 25  | 68  | f      | 0                   | 0.19                         | 0.37    | 0,40    | 0,36    | 0,32     | 0,61                     |
| 26  | 69  | f      | 1                   | 0.18                         | 0.39    | 0,29    | 0,42    | 0,29     | 0,85                     |
| 27  | 61  | f      | 0                   | 0.14                         | 0.41    | 0,47    | 0,39    | 0,46     | 0,66                     |
| 28  | 65  | f      | 1                   | 0.24                         | 0.66    | 1,04    | 0,58    | 0,52     | 0,45                     |
| 29  | 78  | m      | 1                   | 0.28                         | 1.62    | 1,29    | 1,78    | 1,33     | 0,73                     |
| 30  | 44  | f      | 1                   | 0.19                         | 0.31    | 0,34    | 0,28    | 0,36     | 0,78                     |
| 31  | 70  | m      | 1                   | 0.25                         | 0.47    | 0,45    | 0,48    | 0,39     | 0,56                     |
| 32  | 47  | m      | 1                   | 0.12                         | 1.39    | 1,39    | 1,92    | 0,42     | 0,61                     |
| 33  | 70  | f      | 0                   | 0.12                         | 0.26    | 0,29    | 0,19    | 0,21     | 0,89                     |
| 34  | 50  | f      | 1                   | 0.14                         | 0.42    | 0,30    | 0,50    | 0,30     | 0,67                     |
| 35  | 64  | m      | 1                   | 0.15                         | 0.30    | 0,29    | 0,31    | 0,27     | 0,67                     |
| 36  | 60  | f      | 0                   | 0.20                         | 0.39    | 0,27    | 0,90    | 0,23     | 0,70                     |
| 37  | 50  | m      | 1                   | 0.13                         | 0.41    | 0,40    | 0,44    | 0,19     | 0,71                     |
| 38  | 60  | m      | 0                   | 0.13                         | 0.31    | 0,31    | 0,35    | 0,20     | 0,96                     |
| 39  | 64  | m      | 1                   | 0.18                         | 0.31    | 0,38    | 0,28    | 0,38     | 0,62                     |
| 40  | 67  | m      | 1                   | 0.16                         | 0.42    | 0,38    | 0,42    | 0,38     | 0,69                     |
| 41  | 84  | f      | 1                   | 0.27                         | 1.04    | 1,45    | 0,91    | 1,01     | 0,51                     |
| 42  | 69  | f      | 0                   | 0.16                         | 0.51    | 0,52    | 0,50    | 0,43     | 0,67                     |
| 43  | 61  | f      | 0                   | 0.30                         | 0.46    | 0,47    | 0,46    | 0,38     | 0,85                     |
| 44  | 49  | m      | 1                   | 0.17                         | 0.23    | 0,21    | 0,27    | 0,19     | 0,93                     |
| 45  | 55  | m      | 1                   | 0.29                         | 0.52    | 0,53    | 0,50    | 0,52     | 0,69                     |
| 46  | 72  | m      | 0                   | 0.19                         | 0.50    | 0,25    | 0,60    | 0,18     | 0,85                     |
| 47  | 76  | m      | 0                   | 0.23                         | 0.40    | 0,40    | 0,40    | 0,40     | 0,67                     |
| 48  | 62  | f      | 0                   | 0.20                         | 0.63    | 0,44    | 0,71    | 0,38     | 0,42                     |
| 49  | 73  | m      | 0                   | 0.20                         | 0.34    | 0,35    | 0,33    | 0,33     | 0,66                     |
| 50  | 77  | m      | 0                   | 0.33                         | 0.56    | 0,56    | 0,67    | 0,53     | 0,40                     |

Supplemental Table 2. Patient and dosimetry data for the second treatment cycle.

| No | Age | Gender | Skeletal metastases | Dosimetry method |          |         |         |         | Relative platelet counts |
|----|-----|--------|---------------------|------------------|----------|---------|---------|---------|--------------------------|
|    |     |        |                     | Planar           | L4-SPECT | V-SPECT | L-SPECT | T-SPECT |                          |
|    |     |        |                     |                  |          |         |         |         |                          |
| 3  | 59  | f      | 0                   | 0,12             | 0,24     | 0,21    | 0,24    | 0,24    | 0,77                     |
| 4  | 46  | m      | 1                   | 0,14             | 0,25     | 0,23    | 0,23    | 0,23    | 0,68                     |
| 5  | 52  | m      | 0                   | 0,17             | 0,29     | 0,49    | 0,36    | 0,36    | 0,81                     |
| 6  | 35  | m      | 1                   | 0,17             | 0,39     | 0,41    | 0,68    | 0,68    | 0,16                     |
| 7  | 55  | m      | 1                   | 0,19             | 0,47     | 0,72    | 0,65    | 0,65    | 0,47                     |
| 8  | 59  | m      | 0                   | 0,16             | 0,28     | 0,30    | 0,30    | 0,30    | 0,62                     |
| 9  | 54  | f      | 1                   | 0,23             | 0,42     | 0,65    | 0,56    | 0,56    | 0,63                     |
| 10 | 68  | m      | 0                   | 0,17             | 0,25     | 0,35    | 0,28    | 0,28    | 0,66                     |
| 11 | 77  | f      | 0                   | 0,19             | 0,21     | 0,23    | 0,22    | 0,22    | 0,73                     |
| 12 | 64  | m      | 1                   | 0,14             | 0,20     | 0,24    | 0,21    | 0,21    | 0,67                     |
| 13 | 66  | m      | 1                   | 0,14             | 0,19     | 0,37    | 0,22    | 0,22    | 0,34                     |
| 16 | 43  | m      | 0                   | 0,21             | 0,45     | 0,60    | 0,59    | 0,59    | 0,36                     |
| 17 | 77  | f      | 0                   | 0,16             | 0,43     | 0,46    | 0,43    | 0,43    | 0,72                     |
| 18 | 79  | f      | 1                   | 0,22             | 0,92     | 0,93    | 0,92    | 0,92    | 0,61                     |
| 19 | 68  | f      | 1                   | 0,20             | 0,70     | 0,70    | 0,74    | 0,74    | 0,38                     |
| 20 | 57  | f      | 0                   | 0,21             | 0,21     | 0,39    | 0,32    | 0,32    | 0,64                     |
| 21 | 54  | f      | 0                   | 0,13             | 0,31     | 0,29    | 0,27    | 0,27    | 0,77                     |
| 22 | 61  | f      | 0                   | 0,21             | 0,34     | 0,34    | 0,30    | 0,30    | 0,29                     |
| 23 | 71  | m      | 1                   | 0,19             | 0,26     | 0,46    | 0,40    | 0,40    | 0,37                     |
| 24 | 67  | f      | 1                   | 0,17             | 0,35     | 0,39    | 0,36    | 0,36    | 0,64                     |
| 25 | 68  | f      | 0                   | 0,19             | 0,31     | 0,43    | 0,43    | 0,43    | 0,47                     |
| 26 | 69  | f      | 1                   | 0,18             | 0,28     | 0,33    | 0,33    | 0,33    | 0,80                     |
| 27 | 61  | f      | 0                   | 0,14             | 0,25     | 0,29    | 0,25    | 0,25    | 0,69                     |
| 28 | 65  | f      | 1                   | 0,24             | 0,65     | 0,66    | 0,93    | 0,93    | 0,28                     |
| 29 | 78  | m      | 1                   | 0,28             | 0,62     | 1,01    | 0,83    | 0,83    | 0,48                     |
| 30 | 44  | f      | 1                   | 0,19             | 0,23     | 0,28    | 0,24    | 0,24    | 0,69                     |
| 31 | 70  | m      | 1                   | 0,25             | 0,40     | 0,49    | 0,49    | 0,49    | 0,58                     |
| 32 | 47  | m      | 1                   | 0,12             | 0,55     | 1,04    | 1,04    | 1,04    | 0,53                     |
| 33 | 70  | f      | 0                   | 0,12             | 0,17     | 0,42    | 0,68    | 0,68    | 0,90                     |
| 34 | 50  | f      | 1                   | 0,14             | 0,36     | 0,37    | 0,36    | 0,36    | 0,62                     |
| 35 | 64  | m      | 1                   | 0,15             | 0,36     | 0,28    | 0,36    | 0,36    | 0,64                     |
| 36 | 60  | f      | 0                   | 0,20             | 0,29     | 0,39    | 0,29    | 0,29    | 0,74                     |
| 37 | 50  | m      | 1                   | 0,13             | 0,17     | 0,31    | 0,29    | 0,29    | 0,89                     |
| 38 | 60  | m      | 0                   | 0,13             | 0,24     | 0,32    | 0,26    | 0,26    | 0,96                     |
| 39 | 64  | m      | 1                   | 0,18             | 0,30     | 0,24    | 0,30    | 0,30    | 0,89                     |
| 40 | 67  | m      | 1                   | 0,16             | 0,29     | 0,29    | 0,29    | 0,29    | 0,65                     |
| 41 | 84  | f      | 1                   | 0,27             | 0,71     | 0,65    | 0,71    | 0,71    | 0,15                     |
| 42 | 69  | f      | 0                   | 0,16             | 0,70     | 0,55    | 0,60    | 0,60    | 0,77                     |
| 43 | 61  | f      | 0                   | 0,30             | 0,70     | 0,54    | 0,60    | 0,60    | 0,59                     |
| 44 | 49  | m      | 1                   | 0,17             | 0,22     | 0,27    | 0,25    | 0,25    | 0,90                     |
| 45 | 55  | m      | 1                   | 0,29             | 0,46     | 0,46    | 0,46    | 0,46    | 0,53                     |
| 46 | 72  | m      | 0                   | 0,19             | 0,23     | 0,50    | 0,33    | 0,33    | 0,70                     |
| 47 | 76  | m      | 0                   | 0,23             | 0,53     | 0,53    | 0,53    | 0,53    | 0,57                     |
| 48 | 62  | f      | 0                   | 0,20             | 0,34     | 0,47    | 0,40    | 0,40    | 0,29                     |
| 49 | 73  | m      | 0                   | 0,20             | 0,35     | 0,40    | 0,40    | 0,40    | 0,55                     |
| 50 | 77  | m      | 0                   | 0,33             | 0,40     | 0,50    | 0,50    | 0,50    | 0,34                     |
